# Supplementary material for: Pharmacokinetic comparison between quercetin and quercetin 3-O-β-glucuronide in rats by UHPLC-MS/MS
Source: PubMed Central journal article supplement (PMC5075792; doi:10.1038/srep35460), 2016-10-24
Supplement: srep35460-s1.pdf [file srep35460-s1.pdf]

## Supplementary Information

Pharmacokinetic comparison between quercetin and quercetin 3-*O*- $\beta$ -glucuronide in rats by UHPLC-MS/MS

Le-Le Yang, Na Xiao, Xiao-Wei Li, Yong Fan, Raphael N. Alolga, Xiao-Yue Sun, Shi-Lei Wang, Ping Li\* & Lian-Wen Qi\*

State Key Laboratory of Natural Medicines, China Pharmaceutical University, No. 24 Tongjia Lane, Nanjing 210009, China.

\*Corresponding author:

Tel/Fax: +86-25 86185559

E-mail address: Qilw@cpu.edu.cn (L.-W. Qi), Liping2004@126.com (P. Li).

**Supplementary Figure S1.** The MS (a), structure (b), <sup>1</sup>H (c), <sup>13</sup>C-NMR (d),

HMBC (e) and HSQC (f) data of quercetin 3-O-β-glucuronide (Q3G).

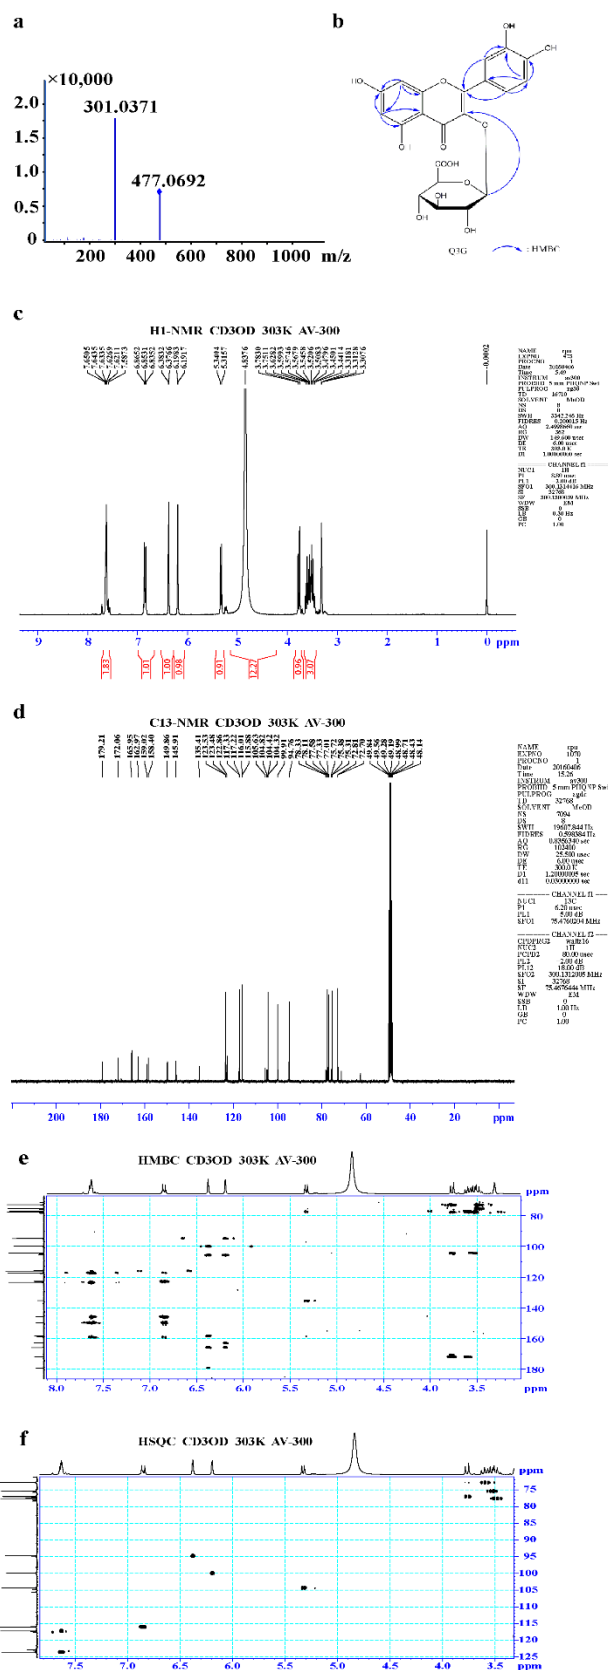

**The  $^1\text{H}$  NMR and  $^{13}\text{C}$  NMR spectra of Q3G were as follows:**

$^1\text{H}$  NMR (300 MHz,  $\text{C}_3\text{D}_6\text{O}$ )  $\delta$  6.19 (1H, d,  $J = 1.98$  Hz, H-6), 6.38 (1H, d,  $J = 1.98$  Hz, H-8), 7.64 (1H, br, H-2'), 7.60 (1H, br, H-6'), 6.85 (1H, d,  $J = 9$  Hz, H-5'), 5.33 (1H, d,  $J = 7.4$  Hz, H-1''), 3.50 (1H, t,  $J = 8.6$  Hz, H-2''), 3.54 (1H, t,  $J = 8.6$  Hz, H-3''), 3.60 (1H, t,  $J = 8.7$  Hz, H-4''), 3.76 (1H, d,  $J = 9.6$  Hz, H-5'');

$^{13}\text{C}$  NMR (75 MHz,  $\text{C}_3\text{D}_6\text{O}$ )  $\delta$ : 159.02 (C-2), 135.41 (C-3), 179.21 (C-4), 162.97 (C-5), 99.91 (C-6), 165.95 (C-7), 94.76 (C-8), 158.40 (C-9), 105.63 (C-10), 122.86 (C-1'), 117.22 (C-2'), 145.91 (C-3'), 149.86 (C-4'), 116.01 (C-5'), 123.53 (C-6'), 104.32 (C-1''), 75.38 (C-2''), 77.58 (C-3''), 72.81 (C-4''), 77.01 (C-5''), 172.06 (C-6'').

The  $^{13}\text{C}$  NMR spectrum showed six carbon signals ( $\delta$  162.97, 99.91, 165.95, 94.76, 158.40 and 105.63), and the  $^1\text{H}$  NMR spectrum showed two proton signals at  $\delta$  6.38 and 6.19 possessed the same coupling constant ( $J = 1.98$  Hz), which could be assigned to A ring of quercetin with the HSQC spectrum. The  $^{13}\text{C}$  NMR spectrum showed six carbon signals ( $\delta$  122.86, 117.22, 145.91, 149.86, 116.01, and 123.53), and the  $^1\text{H}$  NMR spectrum showed three proton signals at  $\delta$  7.64, 7.60, and 6.85, which could be assigned to B ring of quercetin with the HSQC spectrum. These data unambiguously supported the conclusion that the structure of the aglycone moiety of **Q3G** is quercetin.

The  $^{13}\text{C}$ -NMR spectrum of **Q3G** showed six carbon signals assigned to a glucuronic acid moiety, including one anomeric carbon ( $\delta$  104.32) and one carboxyl carbon ( $\delta$  172.06), besides those of an aglycone moiety. In the  $^1\text{H}$ -NMR spectrum of **Q3G**, a sequential *trans*-1,2-diaxial relationship of H-1''–H-5'' ( $\delta$ , 5.32–3.50,  $J = 8.6$ –

9.6 Hz) indicated the presence of a  $\beta$ -D-glucopyranosyl moiety in **Q3G**.

Moreover, the cross peak from H-1'' ( $\delta$  5.32) to C-3 ( $\delta$  135.41) in the HMBC spectrum indicated that the glucuronic acid was conjugated to the C-3 position of the quercetin. Therefore, it was concluded that the structure of **Q3G** was quercetin 3-*O*- $\beta$ -*D*-glucuronide (Q3G).

**Supplementary Table S1.** Calibration curve, correlation coefficients and linear ranges of Q3G and quercetin in different bio-samples.

| Compound         | Bio-sample | Calibration curve       | Correlation coefficient( $r^2$ ) | Linear range (ng/ml) |
|------------------|------------|-------------------------|----------------------------------|----------------------|
| <b>Q3G</b>       | Plasma     | $Y = 0.0453X + 0.0533$  | 0.9968                           | 5-1000               |
|                  | Liver      | $Y = 0.0107X + 0.00277$ | 0.9978                           | 1-50                 |
|                  | Brain      | $Y = 0.0110X + 0.00240$ | 0.9968                           | 0.2-25               |
|                  | Heart      | $Y = 0.0141X + 0.00521$ | 0.9949                           | 1-50                 |
|                  | Kidney     | $Y = 0.0141X + 0.00255$ | 0.9996                           | 1-100                |
| <b>Quercetin</b> | Plasma     | $Y = 0.0260X + 0.00628$ | 0.9979                           | 1-200                |

**Supplementary Table S2.** Summary of the inter- and intra-day variability for the assay of Q3G and quercetin detected by UHPLC-MS/MS method in rat plasma and tissues (Mean  $\pm$  SD,  $n = 5$ ). R.S.D: relative standard deviation (%); R.E.: relative error (%).

| Compound         | Bio-sample | Normal Concentration (ng/ml) | Inter-day(n=5)                 |                     |                   | Inter-day(n=5)                 |                     |                   |
|------------------|------------|------------------------------|--------------------------------|---------------------|-------------------|--------------------------------|---------------------|-------------------|
|                  |            |                              | Measured Concentration (ng/ml) | Precision R.S.D (%) | Accuracy R.E. (%) | Measured Concentration (ng/ml) | Precision R.S.D (%) | Accuracy R.E. (%) |
| <b>Q3G</b>       | Plasma     | 15                           | 15.2 $\pm$ 1.3                 | 8.5                 | 1.2               | 15.3 $\pm$ 0.8                 | 5.5                 | 2.1               |
|                  |            | 150                          | 150 $\pm$ 7.3                  | 4.9                 | -1.0              | 149.4 $\pm$ 6.5                | 4.3                 | -0.4              |
|                  |            | 800                          | 786.8 $\pm$ 74.5               | 9.5                 | -1.7              | 774.1 $\pm$ 60.7               | 7.8                 | -3.2              |
|                  | Liver      | 2.5                          | 2.50 $\pm$ 0.11                | 4.5                 | -0.02             | 2.44 $\pm$ 0.16                | 6.4                 | -2.2              |
|                  |            | 15                           | 14.0 $\pm$ 0.59                | 4.2                 | -6.9              | 14.5 $\pm$ 1.08                | 7.4                 | -3.1              |
|                  |            | 25                           | 24.6 $\pm$ 1.43                | 5.8                 | -1.5              | 24.9 $\pm$ 1.20                | 4.8                 | -0.3              |
|                  | Brain      | 0.5                          | 0.5 $\pm$ 0.03                 | 5.6                 | 4.8               | 0.5 $\pm$ 0.04                 | 7.0                 | 4.1               |
|                  |            | 2.5                          | 2.3 $\pm$ 0.14                 | 6.1                 | -6.1              | 2.5 $\pm$ 0.19                 | 7.8                 | -1.5              |
|                  |            | 15                           | 16.3 $\pm$ 0.51                | 3.1                 | 8.5               | 15.9 $\pm$ 1.14                | 7.2                 | 6.2               |
|                  | Heart      | 2.5                          | 2.6 $\pm$ 0.07                 | 2.8                 | 5.8               | 2.4 $\pm$ 0.21                 | 8.7                 | -4.7              |
|                  |            | 15                           | 15.0 $\pm$ 1.42                | 9.5                 | 0.3               | 14.3 $\pm$ 1.01                | 7.1                 | -2.6              |
|                  |            | 25                           | 25.0 $\pm$ 1.22                | 4.9                 | 0.2               | 23.8 $\pm$ 1.96                | 8.2                 | -5.0              |
|                  | Kidney     | 2.5                          | 2.6 $\pm$ 0.09                 | 3.5                 | 2.1               | 2.5 $\pm$ 0.16                 | 6.2                 | 1.9               |
|                  |            | 15                           | 15.7 $\pm$ 1.05                | 6.7                 | 4.4               | 15.2 $\pm$ 0.99                | 6.5                 | 1.4               |
|                  |            | 80                           | 76.3 $\pm$ 0.69                | 0.9                 | -4.6              | 77.0 $\pm$ 1.57                | 2.0                 | -3.8              |
| <b>Quercetin</b> | Plasma     | 2.5                          | 2.4 $\pm$ 0.2                  | 7.8                 | -2.1              | 2.4 $\pm$ 0.2                  | 7.2                 | -5.7              |
|                  |            | 15                           | 15.0 $\pm$ 1.3                 | 8.6                 | -0.2              | 14.8 $\pm$ 1.1                 | 7.1                 | -1.1              |
|                  |            | 150                          | 150 $\pm$ 2.9                  | 3.7                 | -3.2              | 150 $\pm$ 4.1                  | 5.4                 | -5.1              |

**Supplementary Table S3.** Matrix effect and extraction recovery of Q3G and quercetin.

| Compound         | Bio-sample | Normal Concentration (ng/ml) | Matrix effect (%) | R.S.D (%) | Extraction recovery (%) | R.S.D (%) |
|------------------|------------|------------------------------|-------------------|-----------|-------------------------|-----------|
| <b>Q3G</b>       | Plasma     | 15                           | 97.7±5.3          | 5.4       | 82.1±3.4                | 4.2       |
|                  |            | 150                          | 102.3±6.2         | 6.1       | 75.8±2.1                | 2.8       |
|                  |            | 800                          | 102.6±1.5         | 1.5       | 79.0±1.0                | 1.2       |
|                  | Liver      | 2.5                          | 99.5 ± 2.0        | 2.0       | 64.5 ± 1.9              | 2.9       |
|                  |            | 15                           | 95.3 ± 5.3        | 5.6       | 67.3 ± 1.5              | 2.2       |
|                  |            | 25                           | 92.6 ± 3.2        | 3.5       | 65.4 ± 2.1              | 3.2       |
|                  | Brain      | 0.5                          | 100.9 ± 7.3       | 7.2       | 70.6 ± 6.8              | 9.6       |
|                  |            | 2.5                          | 90.6 ± 1.2        | 1.3       | 73.6 ± 7.5              | 10.2      |
|                  |            | 15                           | 97.1 ± 9.3        | 9.5       | 68.6 ± 8.5              | 12.4      |
|                  | Heart      | 2.5                          | 108.5 ± 5.2       | 4.8       | 66.0 ± 2.2              | 3.3       |
|                  |            | 15                           | 101.8 ± 4.1       | 4.1       | 70.7 ± 3.5              | 4.9       |
|                  |            | 25                           | 96.1 ± 3.3        | 3.4       | 67.7 ± 4.4              | 6.5       |
|                  | Kidney     | 2.5                          | 106.1 ± 3.5       | 3.3       | 70.9 ± 2.4              | 3.4       |
|                  |            | 15                           | 111.2 ± 10.9      | 9.8       | 67.9 ± 2.1              | 3.0       |
|                  |            | 80                           | 99.3 ± 3.5        | 3.5       | 72.9 ± 0.8              | 1.0       |
| <b>Quercetin</b> | Plasma     | 2.5                          | 91.1±5.9          | 6.4       | 99.3±4.5                | 4.6       |
|                  |            | 15                           | 91.6±3.2          | 3.5       | 104.4±9.0               | 8.6       |
|                  |            | 150                          | 93.7±7.0          | 7.4       | 101.7±8.0               | 7.9       |

**Supplementary Table S4.** Stability of Q3G and quercetin in rat plasma and tissues during sample preparation and analytical process.

| Compound         | Bio-sample | Normal<br>Concentration<br>(ng/ml) | Auto-sampler (24 h, 4°C) |                      | Three freeze/thaw cycles |                      | Room temperature (6 h)    |                      |
|------------------|------------|------------------------------------|--------------------------|----------------------|--------------------------|----------------------|---------------------------|----------------------|
|                  |            |                                    | Precision<br>R.S.D (%)   | Accuracy<br>R.E. (%) | Precision<br>R.S.D (%)   | Accuracy<br>R.E. (%) | Precision<br>R.S.D<br>(%) | Accuracy<br>R.E. (%) |
| <b>Q3G</b>       | Plasma     | 15                                 | 3.6                      | 3.7                  | 4.3                      | 2.7                  | 4.0                       | -1.0                 |
|                  |            | 150                                | 2.1                      | -2.3                 | 1.6                      | 0.6                  | 0.8                       | -4.8                 |
|                  |            | 800                                | 1.6                      | -3.1                 | 2.4                      | -6.9                 | 4.6                       | -1.2                 |
|                  | Liver      | 2.5                                | 3.2                      | -2.6                 | 4.4                      | -1.2                 | 4.8                       | -2.1                 |
|                  |            | 15                                 | 7.1                      | -8.2                 | 6.0                      | -8.9                 | 5.0                       | -2.0                 |
|                  |            | 25                                 | 3.3                      | -5.8                 | 2.8                      | 3.7                  | 3.3                       | 5.9                  |
|                  | Brain      | 0.5                                | 7.5                      | 4.6                  | 4.6                      | -0.4                 | 4.3                       | -2.3                 |
|                  |            | 2.5                                | 8.8                      | -1.2                 | 6.8                      | 0.9                  | 6.8                       | -2.2                 |
|                  |            | 15                                 | 5.1                      | 7.3                  | 4.9                      | 5.7                  | 2.2                       | 5.4                  |
|                  | Heart      | 2.5                                | 3.8                      | -10.4                | 6.8                      | -9.0                 | 1.1                       | -12.9                |
|                  |            | 15                                 | 9.1                      | -0.6                 | 7.6                      | 0.7                  | 8.0                       | -2.7                 |
|                  |            | 25                                 | 1.7                      | 0.6                  | 8.9                      | -0.8                 | 6.4                       | -4.0                 |
|                  | Kidney     | 2.5                                | 8.5                      | 2.9                  | 3.6                      | 8.9                  | 6.4                       | -1.5                 |
|                  |            | 15                                 | 4.1                      | 7.3                  | 7.6                      | 6.5                  | 8.1                       | 5.8                  |
|                  |            | 80                                 | 0.9                      | -4.1                 | 1.0                      | -4.1                 | 1.7                       | -3.4                 |
| <b>Quercetin</b> | Plasma     | 2.5                                | 6.9                      | -1.6                 | 5.5                      | -4.7                 | 3.1                       | -0.9                 |
|                  |            | 15                                 | 9.9                      | -0.8                 | 9.7                      | -2.2                 | 4.5                       | -5.4                 |
|                  |            | 150                                | 5.5                      | 0.9                  | 1.6                      | 4.5                  | 4.0                       | 0.0                  |
